# Supplementary material
Source: MDPI journal article supplement (https://www.mdpi.com/2071-1050/13/5/2977)
Supplement: s1 [file s1]

## Effects of ionic liquid and biomass sources on carbon nanotube physical and electrochemical properties

Kudzai Mugadza<sup>1,2</sup>, Annegret Stark<sup>2</sup>, Patrick G. Ndungu<sup>3</sup> and Vincent O. Nyamori<sup>1\*</sup>

<sup>1</sup>School of Chemistry and Physics, University of KwaZulu-Natal, Westville Campus, Private Bag X54001, Durban 4000, South Africa

<sup>2</sup>SMRI/NRF SARCHI Research Chair in Sugarcane Biorefining, School of Engineering, University of KwaZulu-Natal, Durban, South Africa

<sup>3</sup>Department of Chemical Sciences, Energy, Sensors and Multifunctional Nanomaterials Research Group, University of Johannesburg, Doornfontein, Johannesburg, South Africa

### Supplementary Information

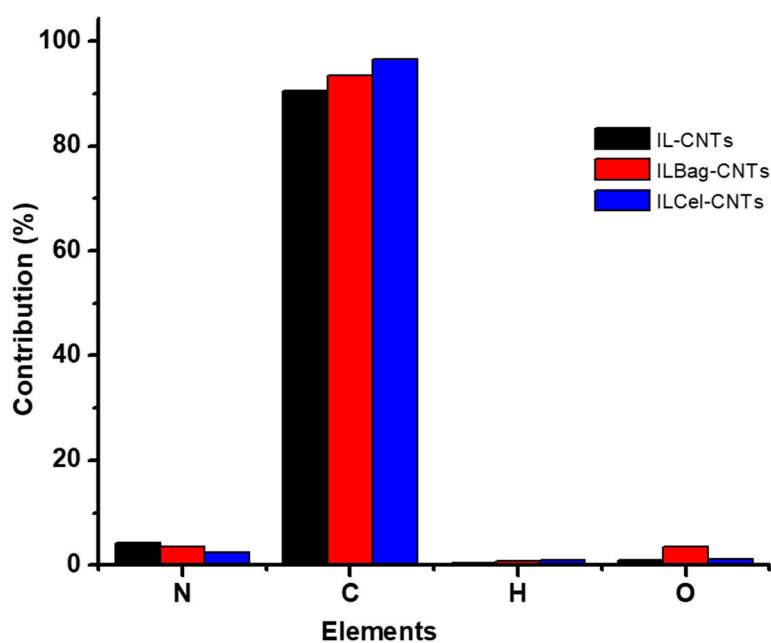

**Figure S1:** Elemental composition of the CNT samples
